# Supplementary material for: Exploring multifaceted roles of bambusicolous Apiospora in Phyllostachys sp.
Source: Research Square preprint supplement (doi:10.21203/rs.3.rs-6757679/v1), 2025-05-30
Supplement: Supplementary file 1 [file a81234f27564160c2476990f.xlsx]

## Sheet: Table S1
Table S1 Information of reference sequences included in the phylogenetic analysis
Species	Strain numbers	Isolation sources	Country	GenBank acc. no.
Apiospora acutiapica	KUMCC 20-0209	Clump of Bambusa bambos	China	MT946342
	KUMCC 20-0210T	Clump of Bambusa bambos	China	MT946343
Ap. agari	KUC21333T	Agarum cribrosum	Korea	MH498520
	KUC21361	Agarum cribrosum	Korea	MH498519
Ap. aquatica	S-642T	Submerged wood	China	MK828608
Ap. arctoscopi	KUC21331T	Egg masses of Arctoscopus japonicus	Korea	MH498529
	KUC21344	Egg masses of Arctoscopus japonicus	Korea	MH498528
Ap. arundinis	CBS 124788	Living leaves of Fagus sylvatica	Switzerland	KF144885
	CBS 133509	Sclerotium buried in sandy field	USA	KF144886
Ap. aurea	CBS 244.83T	Air	Spain	AB220251
Ap. balearica	AP24118T	Undetermined Poaceae	Spain	MK014869
Ap. bambusicola	MFLUCC 20-0144T	Dead culms of bamboo	Thailand	MW173030
Ap. biseriale	CGMCC3.20135T	Dead culms of bamboo	China	MW481708
	GZCC20-0099	Dead culms of bamboo	China	MW481709
Ap. camelliae-sinsensis	LC5007T	Camellia sinensis	China	KY494704
	LC8181	Brassica rapa subsp. oleifera	China	KY494761
Ap. chiangraiense	MFLU:21-0046	Dead culms of bamboo	Thailand	MZ542520
Ap. chromolaenae	MFLUCC 17-1505T	Dead aerial culms of Chromolaena odorata	Thailand	MT214342
Ap. cordylines	GUCC 10026	Cordyline fruticosa	China	MT040105
	GUCC 10027	Cordyline fruticosa	China	MT040106
Ap. cyclobalanopsidis	CGMCC3.20136T	Leaf of Cyclobalanopsi glauca (Thunb.) Oerst	China	MW481713
	GZCC20-0103	Leaf of Cyclobalanopsi glauca (Thunb.) Oerst	China	MW481714
Ap. dendrobii	MFLUCC 14-0152T	Root of Dendrobium harveyanum	Thailand	MZ463151
Ap. descalsii	AP31118AT	Ampelodesmos mauritanicus	Spain	MK014870
Ap. dichotomanthi	LC4950T	Dichotomanthes tristaniicarpa	China	KY494697
	LC8175	Dichotomanthes tristaniicarpa	China	KY494755
Ap. esporlensis	AP16717T	Phyllostachys aurea	Spain	MK014878
Ap. euphorbiae	IMI 285638b	Bambusa sp.	Bangladesh	AB220241
Ap. fermenti	KUC21288	Seaweed	Korea	MF615230
	KUC21289T	Seaweed	Korea	MF615226
Ap. gaoyouensis	CFCC 52301	Phragmites australis	China	MH197124
	CFCC 52302	Phragmites australis	China	MH197125
Ap. garethjonesii	JHB004T	Bamboo	China	KY356086
Ap. gelatinosa	CS19-29T	Dead branch of bamboo	China	MW481706
Ap. guiyangensis	HKAS 102403T	Dead culm of unidentified grass	China	MW240647
Ap. guizhouensis	LC5318	Air	China	KY494708
	LC5322T	Air	China	KY494709
Ap. hispanica	IMI 326877T	Maritime sand	Spain	AB220242
Ap. hydei	CBS 114990T	Culms of Bambusa tuldoides	Hong Kong	KF144890
	LC7103	Leaf of bamboo	China	KY494715
Ap. hyphopodii	JHB003	Bamboo	China	KY356088
	MFLUCC 15-003T	Bamboo	Thailand	KR069110
Ap. hysterina	AP29717	Phyllostachys aurea	Spain	MK014875
	ICPM 6889T	Bamboo	New Zealand	MK014874
Ap. iberica	AP10118T	Arundo donax	Portugal	MK014879
Ap. intestini	CBS 135835	Gut of grasshopper	India	KR011352
Ap. italica	AP29118	Phragmites australis	Spain	MK014881
	AP221017T	Arundo donax	Italy	MK014880
Ap. jatrophae	AMH-9557T	Jatropha podagrica	India	JQ246355
Ap. jiangxiensis	LC4494	Phyllostachys sp.	China	KY494690
	LC4577T	Maesa sp.	China	KY494693
Ap. kogelbergensis	CBS 113333	Dead culms of Restionaceae	South Africa	NR_120272
	CBS 113332	Dead culms of Cannomois virgata	South Africa	KF144891
Ap. koreana	KUC21332T	Egg masses of Arctoscopus japonicus	Korea	MH498524
	KUC21348	Egg masses of Arctoscopus japonicus	Korea	MH498523
Ap. lageniformis	KUC21686	Top of culm of Phyllostachys nigra var. henonis	Korea	ON764022
	KUC21687	Top of culm of Phyllostachys nigra var. henonis	Korea	ON764023
Ap. locuta-pollinis	LC11683T	Bee bread	China	MF939595
Ap. longistroma	MFLUCC 11-0481T	Bamboo	Thailand	KU940141
Ap. malaysiana	CBS 251.29	Culm base of Cinnamomum camphora	Malaysia	KF144897
	CBS 102053T	Macaranga hullettii	Malaysia	KF144896
Ap. marii	CBS 497.90T	Beach sand	Spain	AB220252
	CBS 114803	Pseudosasa hindsii	Hong Kong	KF144899
Ap. marina	KUC21328T	Seaweed	Korea	MH498538
	KUC21353	Seaweed	Korea	MH498537
Ap. mediterranea	IMI 326875T	Air	Spain	AB220243
Ap. minutispora	1.7e-41	Soil	Korea	LC517882
Ap. mytilomorpha	DAOM 214595	Andropogon sp.	India	KY494685
Ap. neobambusae	LC7106T	Leaf of bamboo	China	KY494718
	LC7107	Leaf of bamboo	China	KY494719
Ap. neochinense	CFCC 53036T	Fargesia qinlingensis	China	MK819291
Ap. neogarethjonesii	HKAS 102408T	Bamboo	China	NR_171943
Ap. neosubglobosa	JHB007T	Bamboo	China	KY356090
Ap. obovata	LC4940T	Lithocarpus sp.	China	KY494696
	LC8177	Lithocarpus sp.	China	KY494757
Ap. ovata	CBS 115042	Pseudosasa hindsii	Hong Kong	KF144903
Ap. paraphaeosperma	GUCC 10126	-	-	MT040110
	MFLUCC 13-0644T	Dead culms of bamboo	Thailand	KX822128
Ar. phaeospermum	CBS 114317	Leaf of Hordeum vulgare	Iran	KF144906
	CBS 114318	Leaf of Hordeum vulgare	Iran	KF144907
Ap. phragmitis	CPC 18900	Culms of Phragmites australis	Italy	KF144909
Ap. phyllostachydis	MFLUCC 18-1101	Dead culms of Phyllostachys heteroclada	China	MK351842
Ap. piptatheri	AP4817AT	Piptatheri miliaceum	Spain	MK014893
	KUC21220	Sargassum sp.	Korea	KT207736
Ap. psedospegazzinii	CBS 102052T	Culm colonised by ants	Malaysia	KF144911
Ap. pseudohyphopodii	KUC21680	Culm of Phyllostachys pubescens	Korea	ON764026
	KUC21684	Culm of Phyllostachys pubescens	Korea	ON764027
Ap. pseudoparenchymatica	LC7234T	Leaf of bamboo	China	KY494743
Ap. pseudorasikravindrae	KUMCC 20-0208T	Sheath of Bambusa dolichoclada	China	MT946344
	KUMCC 20-0211	Sheath of Bambusa dolichoclada	China	MT946345
Ap. pseudosinensis	CPC 21546T	Leaf of bamboo	Netherlands	KF144910
Ap. pterosperma	CPC 20193T	Leaf of Lepidosperma gladiatum	Australia	KF144913
Ap. pusillisperma	KUC21321T	Seaweed	Korea	MH498533
	KUC21357	Seaweed	Korea	MH498532
Ap. qinlingensis	CFCC 52303T	Fargesia qinlingensis	China	MH197120
	CFCC 52304	Fargesia qinlingensis	China	MH197121
Ap. rasikravindrae	LC5449	Soil	China	KY494713
	LC7115	Leaf of bamboo	China	KY494721
	NFCCI 2144T	Soil	Norway	JF326454
Ap. sacchari	CBS 301.49	Bamboo	Indonesia	KF144917
	CBS 372.67	Air	-	KF144918
Ap. saccharicola	CBS 191.73	Air	Netherlands	KF144920
	CBS 463.83	Dead culms of Phragmites australis	Netherlands	KF144921
Ap. sargassi	KUC21228T	Sargassum sp.	Korea	KT207746
	KUC21232	Sargassum sp.	Korea	KT207750
Ap. sasae	CPC 38165T	Dead culms of Sasa veitchii	Netherlands	MW883402
Ap. septata	CGMCC3.20134T	Dead branch of bamboo	China	MW481711
	GZCC20-0109	Dead branch of bamboo	China	MW481712
Ap. serenensis	IMI 326869T	Excipients, atmosphere and home dust	Spain	AB220250
Ap. setariae	Beilin 024	Setaria viridis	China	MT492005
Ap. setostroma	KUMCC 19-0217	Dead branches of bamboo	China	MN528012
Ap. sichuanensis	HKAS 107008	Dead culm of Poaceae	China	MW240648
Ap. stipae	CPC 38101T	Dead culm of Celtica gigantea	Spain	MW883403
Ap. subglobosa	MFLUCC 11-0397T	Bamboo	Thailand	KR069112
Ap. subrosea	LC7292T	Leaf of bamboo	China	KY494752
Ap. taeanensis	KUC21322T	Seaweed	Korea	MH498515
	KUC21359	Seaweed	Korea	MH498513
Ap. thailandica	LC5630	Rotten wood	China	KY494714
	MFLUCC 15-0202T	Dead culms of bamboo	Thailand	KU940145
Ap. vietnamensis	IMI 99670	Citrus sinensis	Vietnam	KX986096
Ap. xenocordella	CBS 478.86	Soil from roadway	Zimbabwe	KF144925
	CBS 595.66	Soil	Austria	KF144926
Ap. yunnana	MFLUCC 18-1102	Dead or nearly dead culms of Phyllostachys heteroclada	China	MK351843
Nigrospora gorlenkoana	CBS 480.73T	Vitis vinifera	Kazakhstan	KX986048
TType species

## Sheet: Table S2
Table S2 Relative abundance and identification of Apiospora candidate mOTUs
#OTU ID	New code	seq	Phylogeny	DJMC-D-1	DJMC-D-2	DJMC-D-3	DJMC-F-1	DJMC-F-2	DJMC-F-3	DJMC-L-1	DJMC-L-3	DJML-D-1	DJML-D-2	DJML-D-3	DJML-F	DJML-F-2	DJML-F-3	DJML-L	DJML-L-2	DJML-L-3	DJMR-D-1	DJMR-D-2	DJMR-D-3	DJMR-F-2	DJMR-F-3	DJMRS-F	DJMRS-L	DJMRS-L-2	DJMRS-L-3	DJSC-D-2	DJSC-D-3	DJSC-F-1	DJSC-F-2	DJSC-F-3	DJSC-L-1	DJSC-L-2	DJSC-L-3	DJSC-d	DJSL-D-1	DJSL-D-2	DJSL-D-3	DJSL-F	DJSL-F-2	DJSL-F-3	DJSL-L	DJSL-L-2	DJSL-L-3	DJSR-D-1	DJSR-D-2
03d90537711d3ad1a201b7be92cb9ffb	ITS_Apio_01	GAAATGCGATAAGTAATGTGAATTGCAGAATTCAGTGAATCATCGAATCTTTGAACGCACATTGCGCCCATCAGTATTCTGGTGGGCATGCCTGTTCGAGCGTCATTTCAACCCTTAAGCCTAGCTTAGTGTTGGGAATCGACTGTATTGTCGTTCCTTAAAGACAGTGGCGGAGCGGCAGTTGTCCTCTGAGCGTAGTAAATTTATTTCTCGCTTCTGTAAGGCTCTGTTCTCCCGCCATAAAACCCCCCAATTTTTAGTGGTTGACCTCGGATCAGGTAGGAATACCCGCTGAACTTAA	ITS_Apio_01	0	0	0	0	0	0	0	0	0	0	0	0	0.00029223	0	0	0	0.00168357	0	0	0	0	0	0	0	0	0	0	0	0	0	0	0	0	0	0	0	0	0	0	0	0	0	0	0	0	0
21da8cd9797904e86aec1cfdcd6acd56	ITS_Apio_02	GAAATGCGATAAGTAATGTGAATTGCAGAATTCAGTGAATCATCGAATCTTTGAACGCACATTGCGCCCATCAGTATTCTGGTGGGCATGCCTGTTCGAGCGTCATTTCAACCCTTAAGCCTAGCTTAGTGTTGGGAATCTGCTGTACTGCAGTTCCTTAAAGACAGTGGCGGAGCGGCGGTAGTCCTCTGAGCGTAGTAATTTATTCCCCGCTTCTGTCAGGCTCTGTCCTCCCGCCATAAAACCCCCAATTTTTTAGTGGTTGACCTCGGATCAGGTGGGAATACCCGCTGAACTTAA	Apiospora arundinis	0	0	0	0	0	0	0	0	0	0	0	0	0	0	0.000238645	0	0	0	0	0	0	0	0	0	0	0	0	0	0	0	0	0	0	0	0	0	0	0	0	0	0	0	0	0	0	0
2d877ececd382683586eb656d59c70b9	ITS_Apio_03	GAAATGCGATAAGTAATGTGAATTGCAGAATTCAGTGAATCATCGAATCTTTGAACGCACATTGCGCCCATCAGTATTCTGGTGGGCATGCCTGTTCGAGCGTCATTTCAACCCTTAAGCCTAGCTTAGTGTTGGGAATCTGCTGTACTGCAGTTCCTTAAAGACAGTGGTGGAGCGGCGGTAGTCCTCTGAGCGTAGTAATTTATTCCTCGCTTTTGTCAGGCTCTGTCCTCCAGCCGTAAAACCCCCAATTTTTTAGTGGTTGACCTCGGATCAGGTAGGAATACCCGCTGAACTTAA	Apiospora arundinis	0	0	0	0	0	0	0	0	0.00171999	0	0	0	0	0	0	0	0	0	0	0	0	0	0	0	0	0	0	0	0	0	0	0	0	0	0	0	0	0	0	0	0	0	0	0	0	0
2fc65bac41863985f830a3a5245eff98	ITS_Apio_04	GAAATGCGATAAGTAATGTGAATTGCAGAATTCAGTGAATCATCGAATCCTTGAACGCACATTGCGCCCATCAGTATTCTGGTGGGCATGCCTGTTCGAGCGTCATTTCAACCCTTAAGCCGAGCTTAGTGTTGGGAATCTGCTGTACTGCAGTTCCTTAAAGACAGTGGCGGAGCGGCGGTAGTCCTCTGAGCGTAGTAATTTATTCCCCGCTTTTGTCAGGCTCTGTCCTCCCGCCATAAAACCCCCAATTTTTTAGTGGTTGACCTCGGATCAGGTAGGAATACCCGCTGAACTTAA	Apiospora arundinis	0	0	0	0	0	0	0	0	0	0	0	0	0	0	0	0	0	0	0	0	0	0	0	0	0	0	0	0	0	0	0	0	0	0.00151244	0	0	0	0	0	0	0	0	0	0	0	0
565c6983cce088b7d54db96a828e5948	ITS_Apio_05	GATATGCGATAAGTAATGTGAATTGCAGAATTCAGTGAATCATCGAATCTACGAACGCACATTGCGCCCATCAGTATTCTGGTGGGCATGCCTGTTCGAGCGTCATTTCAACCCTTAAGCCTAGCTTAGTGTTGGGAATCTGCTGTACTGCAGTTCCTTAAAGACAGTGGCGGAGCGGCGGTAGTCCTCTGAGCGTAGTAATTTATTCCTCGCTTTTGTCAGGCTCTGTCCTCCCGCCATAAAACCCCCAATTTTTTAGTGGTTGACCTCGGATCAGGTAGGAATACCCGCTGAACTTAA	Apiospora arundinis	0	0	0	0	0	0	0	0	0	0	0	0	0	0	0	0	0	0	0	0	0	0	0	0	0	0	0	0	0	0	0	0	0	0	0	0	0	0	0	0	0	0	0	0	0	0
5ce6119b9af0a7a14896c342a1e8791c	ITS_Apio_06	GAAATGCGATAAGTAATGTGAATTGCAGAATTCAGTAAATCATCGAATCTTTGAACGCACATTGCGCCCATCAGTATTCTGGTGGGCATGCCTGTTCGAGCGTCATTTCAACCCTTAAGCCTAGCTTAGTGTTGGGAATCTGCTGTACTGCAGTCCCTTAAAGACAGTGGCGGAGCGGCGGTAGTCCTCTGAGCGTAGTAATTTATTCCTCGCTTTTGTCAGGCTCTGTCCTCCCGCCATAAAACCCCCAATTTTTTAGTGGTTGACCTCGGATCAGGTAGGAGTACCCGCTGAACTTAA	Apiospora arundinis	0	0	0	0	0	0	0	0	0	0	0	0	0	0	0	0	0	0	0	0	0	0	0	0	0	0	0	0	0	0	0	0	0	0	0	0	0	0	0.000773531	0	0	0	0	0	0	0
6b08a3a507b7d8f446cfb80e15a5323b	ITS_Apio_07	GAAATGCGATAAGTAATGTGAATTGCGGAATTCAGTGAATCATCGAATCTTTGAACGCACATTGCGCCCATCAGTATTCTGGTGGGCATGCCTGTTCGAGCGTCATTTCAACCCTTAAGCCTAGCTTAGTGTTGGGAATCTGTTGTACTGTAGTTCCTTAAAGACAGTGGCGGAGCGGCGGTAGTCCTCTGAGCGTAGTAATTTATTCCTCGCTTTTGTCAGGCTCTGTCCTCCCGCCATAAAACCCCCAATTTTTTAGTGGTTGACCTCGGATCAGGTAGGAGTACCCGCTGAACTTAA	Apiospora arundinis	0	0	0	0	0	0	0	0	0	0	0	0	0	0	0	0	0	0	0	0	0	0	0	0	0	0	0	0	0	0	0	0	0	0	0	0	0	0	0	0	0	0	0	0	0	0
70e6f3e351c0302700fed798b21df555	ITS_Apio_08	GCATCGATGAACGCAGCGAAATGCGATAAGTAATGTGAATTGCAGAATTCAGTGAATCATCGAATCTTTGAACGCACATTGCGCCCACTAGTATTCTGGTGGGCATGCCTGTTCGAGCGTCATTTCAACCCTTAAGCCTAGCTTAGTGTTGGGAATCCACTGTACTGTGGTTCCTTAAAGACAGTGGCGGAGCGGCAGCGGTCCTCTGAGCGTAGTAATTTTTTATTCTCGCTTCTGTTAGGCCCTGTCCTCCCGCCGTAAAACCCCCTATTTTTTAGTGGTTGACCTCGGATCAGGTAGGAATACCCGCTGAACTTAA	Apiospora hysterina	0	0	0	0	0.000236201	0	0	0	0	0	0	0	0	0	0	0	0	0	0	0	0	0	0	0	0	0	0	0	0	0	0	0	0	0	0	0	0	0	0	0	0	0	0	0	0	0
76df596a0f2528f3faf18fe2f3ebee0e	ITS_Apio_09	GAAATGCGATAAGTAATGTGAATTGCAGAATTCAGTGAATCATCGAATCTTTGAACGCACATTGCGCCCATCAGTATTCTGGTGGGCATGCCTGTTCGAGCGTCATTTCAATCCTTAAGCCTAGCTTAGTGTTGGGAATCTGCTGTACTGCAGTTCCTTAAAGACAGTGGCGGAGCGGCGGTAGTCCTCTGAGCGTAGTAATTTATTCCTCGCTTTTGTTAGGCTCCGTCCTCCCGCCATAAAACCCCCAATTTTTTAGTGGTTGACCTCGGATCAGGTAGGAATACCCGCTGAACTTAA	Apiospora arundinis	0	0	0	0	0	0	0	0	0	0	0	0	0	0	0	0	0	0	0	0	0	0	0	0	0	0	0	0	0	0	0	0	0	0	0	0	0	0	0.00097786	0	0	0	0	0	0	0
7e2faa2e87e86696d77dae01f6564545	ITS_Apio_10	GAAATGCGATAAGTAATGTGAATTGCAGAATTCAGTGAATCATCGAATCTTTGAACGCACATTGCGCCCATCAGTATTCTGGTGGGCATGCCTGTTCGAGCGTCATTTCAACCCTTAAGCCTAGCTTAGTGTTGGGAATCTGCTGTACTGCAGTTCCTTGAAGACAGTGGCGGAGCGGCGGTAGTCCTCTGAGCGTAGTAATTTATTCCTCGCCTTTGTCAGGCTCTGTCCTCCCGCCATAAAACCCCCAATTTTTTAGTGGTTGACCTCGGATCAGGTAGGAATACCCGCTGAACTTAG	Apiospora arundinis	0	0	0	0	0	0	0	0	0	0	0	0	0	0	0	0	0	0	0	0	0	0	0	0	0	0	0	0	0	0	0	0	0	0	0	0	0	0	0.00112381	0	0	0	0	0	0	0
7e6b6ba14d00a528a336b946e2278721	ITS_Apio_11	GAAATGCGATAAGTAATGTGAATTGCAGAATTCAGTGAATCATCGAATCTTTGAACGCACATTGCGCCCATCAGTATTCTGGTGGGCATGCCTGTTCGAGCGTCATTTCAACCCTTAAGCCTAGCTTAGTGTTGGGAATCTGCTGTACTGCAGTTCCTTAAAGACAGTGGCGGAGCGGCGGTAGTCCTCTGAGCGTAGTAATTTTTTATTCTCGCTTCTGTTAGGCCCTGTCCTCCCGCCGTAAAACCCCCTATTTTTTAGTGGTTGACCTCGGATCAGGTAGGAATACCCGCTGAACTTAA	Apiospora sp. 1	0	0	0	0	0	0	0	0	0	0	0	0	0	0	0	0	0	0	0	0	0	0	0	0	0	0	0	0	0.000244089	0	0	0	0	0	0	0	0	0	0	0	0	0	0	0	0	0
7fac45ca1f8e33c351445f3950f67220	ITS_Apio_12	GAAATGCGATAAGTAATGTGAATTGCAGAATTCAGTGAATCATCGAATCTTTGAACGCACATTGCGCCCATTAGTATTCTAGTGGGCATGCCTGTTCGAGCGTCATTTCAACCCTTAAGCCTAGCTTAGTGTTGGGAATCTACTGTACTGTAGTTCCTTAAAGACAGTGGCGGAGCGCTAGTTGTCCTCTGAGCGTAGTAATTTTATTTCTCGCTTTTGTTAGGCGCTGGCCTCCCGCCATAAAACCCCCTATTTTTTGTGGTTGACCTCGGATCAGGTAGGAATACCCGCTGAACTTAA	ITS_Apio_12	0	0	0	0.00545234	0.00518165	0.00648772	0	0	0	0	0	0	0	0	0	0	0	0	0	0	0	0	0	0	0	0	0	0.000146572	0	0	0	0	0	0	0.000144395	0	0	0	0	0	0	0	0	0	0	0
97370e2ca97acf355ebd93540be3a5d4	ITS_Apio_13	GAAATGCGATAAGTAATGTGAATTGCAGAATTCAGTGAATCATCGAATCTTTGAACGCACATTGCGCCCATTAGTATTCTAGTGGGCATGCCTGTTCGAGCGTCATTTCAACCCTTAAGCCTAGCTTAGTGTTGGGAATCTACTGTACTGTAGTTCCTTAAAGACAGTGGCGGAGCGCTAGTTGTCCTCTGAGCGTAGTAATTTTATTTCTCGCTTTTGTTAGGCGCTGGCCTCCCGCCATAAAACCCCTAATTTTTTTTGTGGTTGACCTCGGATCAGGTAGGAATACCCGCTGAACTTAA	ITS_Apio_13	0	0	0	0.00162068	0.00248011	0.00109317	0	0	0	0	0	0	0	0	0	0	0	0	0	0	0	0	0	0.00022642	0	0	0	0	0	0	0	0	0	0	0	0	0	0	0	0	0	0	0	0	0	0
991251b04966fd8fdb8cae0f101f6c63	ITS_Apio_14	GAGATGCGATAAGTGATGTGAATTGCAGAATTCAGTGAATCATCGAATCCTTGAACGCACATTGCGCCCATCAGTATTCTGGTGGGCATGCCTGTTCGAGCGTCATTTCAACCCTTAAGCCTAGCTTAGTGTTGGGAATCTGCTGTACTGCAGTTCCTTAAAGACAGTGGCGGAGCGGCGGTAGTCCTCTGAGCGTAGTAATTTATTCCTCGCTTTTGTCAGGCTCTGTCCTCCCGCCATAAAACCCCCAATTTTTTAGTGGTTGACCTCGGATCAGGTAGGAATACCCGCTGAACTTAA	Apiospora arundinis	0	0	0	0	0	0	0	0	0	0	0	0.000209024	0	0	0	0	0	0	0	0	0	0	0	0	0	0	0	0	0	0	0	0	0	0	0	0	0	0	0	0	0	0	0	0	0	0
aa8f609683c9d7342fc3aa72548562a8	ITS_Apio_15	GAAATGCGATAAGTAATGTGAATTGCAGAATTCAATGAATCATCGAATCTCTGAACGCACATTGCGCCCATCAGTATTCTGGTGGGCATGCCTGTTCGAGCGTCATTTCAACCCTTAAGCCTAGCTTAGTGTTGGGAATCTGCTGTACTGCAGTTCCTTAAAGACAGTGGCGGAGCGGCGGTAGTCCTCTGAGCGTAGTAATTTATTCCTCGCTTTTGTCAGCCTCTGTCCTCCCGCCATAAAACCCCCAATTTTTTAGTGGTTGACCTCGGATCAGGTAGGAATACCCGCTAAACTTAA	Apiospora arundinis	0	0	0	0	0	0	0	0	0	0	0	0	0	0	0	0	0	0	0	0	0	0	0	0	0	0	0	0	0	0	0	0	0	0	0	0	0	0	0.000700556	0	0	0	0	0	0	0
b20d1060cd195689245f2a4e79a4aead	ITS_Apio_16	GAAATGCGATAAGTAATGTGAATTACAGAATTCGGTGAATCATCGAATCTTTGAACGCACATTGCGCCCATCAGTATTCTGGTGGGCATGCCTGTTCGAGCGTCATTTCAACCCTTAAGCCTAGCTTAGTGTTGGGAACCTGCTGTACTGCAGTTCCTTAAAGACAGTGGCGGAGCGGCGGTAGTCCTCTGAGCGTAGTAATTTATTCCTCGCTTTTGTCAGGCTCTGTCCTCCCGCCATAAAACCCCCAATTTTTTAGTGGTTGACCTCGGATCAGGTAGGAATACCCGCTGAACTTAA	Apiospora arundinis	0	0	0	0	0	0	0	0	0	0	0	0	0	0	0	0	0	0	0	0	0	0	0	0	0	0	0	0	0	0	0	0	0	0	0	0	0	0	0.000671366	0	0	0	0	0	0	0
c23262ad00021c78b23a3d8920a61504	ITS_Apio_17	GAAATGCGATAAGTGATGTGAATTGCAGAATTCAGTGAATCATCGAATCTTTGAACGCACATTGCGCCCATCAGTATTCTGGTGGGCATGCCAGTTCGGGCGTCATTTCAACCCTTAAGCCTAGCTTAGTGTTGGGAATCTGCTGTACTGCAGTTCCTTAAAGACAGTGGCGGAGCGGCGGTAGTCCTCTGAGCGTAGTAATTTATTCCTCGCTTTTGTCAGGCTCTGTCCTCCCGCCATAAAACCCCCAATTTTTTAGTGGTTGACCTCGGATCAGGTAGGAATACCCGCTGAACTTAA	Apiospora arundinis	0	0	0	0	0	0	0	0	0	0	0	0	0	0	0.00013017	0	0	0	0	0	0	0	0	0	0	0	0	0	0	0	0	0	0	0	0	0	0	0	0	0	0	0	0	0	0	0
ca3f9db05c4dc652e05cc6b76996f619	ITS_Apio_18	GAAATGCGATAAGTAATGTGAATTGCAGAATTCAGTGAATCATCGAATCTTTGAACGCACATTCCGCCCATCAGTATTCCGGTGGGCATGCCTGTTCGAGCGTCATTTCAACCCTCAAGCCTAGCTTAGTGTTGGGAATCTACTGTATTGTAGTTCCTTAAAGACAGTGGCGGAGCGATAGTTGTCCTCTGAGCGTAGTAAATTTATTTCTCGCTTCTGTAAGGCTCTATTCTCCCGCCATAAAACCCCCAATTTTTTAGTGGTTAACCTCGGATCAGGTAGGAATACTCGCTGAACTTAA	Apiospora camelliae-sinensis	0	0	0	0	0	0	0	0	0	0	0	0	0	0	0	0	0	0	0	0	0	0	0	0	0	0	0	0	0	0	0	0	0	0	0	0	0	0	0	0	0	0	0	0	0	0
de588a671e87458a0a7a60c9128ba030	ITS_Apio_19	GAAATGCGATAAGTAATGTGAATTGCAGAATTCAGTGAATCATCGAATCTTTGAACGCACATTGCGCCCATCAGTATTCTGGTGGGCATGCCTGTTCGAGCGTCATTTCAACCCTTAAGCCTAGCTTAGTGTTGGGAATCTGCTGTACTGCAGTTCCTTAAAGACAGTGGCGGAGCGGCGGTAGCCCTCTGAGCGTAGTAATTTATTCCTCGCTTTTGTCATGCTCTGTCCTCCCGCCATAAAACCCCCAATTTTTTAGTGGTTGACCTCGGATCAGGTAGGAATACCCGCTGGACTTAA	Apiospora arundinis	0	0	0	0	0	0	0	0	0	0	0	0	0	0	0.00017356	0	0	0	0	0	0	0	0	0	0	0	0	0	0	0	0	0	0	0	0	0	0	0	0	0	0	0	0	0	0	0
e9293ec2efbad6e96b549a0e95d95c7a	ITS_Apio_20	GAAATGCGATAAGTAATGTGAATTGCAGAATTCAGTGAATCATCGAATCTTTGAACGCGCATTGCGCCCATCAGTATTCTGGTGGGCATGCCTGTTCGAGCGTCATTTCAACCCTTAAGCCTAGCTTAGTGTTGGGAATCTACTGCATTGTAGTCCCTTACAGACAGTGGCGGAGCGATAGTTGTCCTCTGAGCGTAGTAAATTTATTTCTCGCTTCTGTAAGGCTCTATTCTCCCGCCATAAAACCCCCAATTTTTTAGTGGTTGACCTCGGATCAGGTAGGAATACCCGCTGAACTTAA	Apiospora camelliae-sinensis	0	0	0	0	0	0	0	0	0	0	0	0	0	0	0	0	0	0	0	0	0	0	0	0	0	0	0	0	0	0	0	0	0	0	0	0	0	0	0	0	0	0	0	0	0	0
fb313de218b446527ee9983db772d8a3	ITS_Apio_21	GAAATGCGATAAGTATTGTGAATTGCAGAATTCAGTGAATCATCGAATCTTTGAACGCACATCGCGCCCATCAGTATTCTGGTGGGCATGCATGTTCGAGCGTCATTTCAACCCTTAAGCCTAGCTTAGTGTTGGGAATCTGCTGTACTGCAGTTCCTTAAAGACAGTGGCGGAGCGGCGGTAGTCCTCTGAGCGTAGTAATTTATTCCTCGCTTTTGTCAGGCTCTGTCCTCCCGCCATAAAACCCCCAATTTTTTAGTGGTTGACCTCGGATCAGGTAGGAATACCCGCTGAACTTAA	Apiospora arundinis	0	0	0	0	0	0	0	0	0	0	0	0	0	0	0	0	0	0	0	0	0	0	0	0	0	0	0	0	0	0	0	0	0	0	0	0	0	0	0	0	0	0	0	0	0	0
JF326454.1.595	ITS_Apio_22	GAAATGCGATAAGTAATGTGAATTGCAGAATTCAGTGAATCATCGAATCTTTGAACGCACATTGCGCCCATCAGTATTCTGGTGGGCATGCCTGTTCGAGCGTCATTTCAACCCTTAAGCCTAGCTTAGTGTTGGGAATCGACCGTAGGGTCGTTCCTTAAAGACAGTGGCGGAGCGGCAGTGGTCCTCTGAGCGTAGTAAATTTATTTCTCGCTTTTGTCAGGCCCTGTCCTCCCGCCATAAAACCCCCAATTTTTTAGTGGTTGACCTCGGATCAGGTAGGAATACCCGCTGAACTTAA	ITS_Apio_22	0	0.00385179	0	0	0	0	0	0	0	0.00866897	0	0.0052351	0.0014027	0.00150609	0	0.0011936	0	0.00634664	0	0	0	0	0.000183609	0.000240572	0	0.00112049	0.000218016	0	0.0200708	0	0.0509429	0	0.00537684	0.00275579	0	0.0096644	0.0188283	0	0	0.0086094	0.00246802	0.00012959	0.00148973	0	0	0
KF144885.1.725	ITS_Apio_23	GAAATGCGATAAGTAATGTGAATTGCAGAATTCAGTGAATCATCGAATCTTTGAACGCACATTGCGCCCATCAGTATTCTGGTGGGCATGCCTGTTCGAGCGTCATTTCAACCCTTAAGCCTAGCTTAGTGTTGGGAATCTGCTGTACTGCAGTTCCTTAAAGACAGTGGCGGAGCGGCGGTAGTCCTCTGAGCGTAGTAATTTATTCCTCGCTTTTGTCAGGCTCTGTCCTCCCGCCATAAAACCCCCAATTTTTTAGTGGTTGACCTCGGATCAGGTAGGAATACCCGCTGAACTTAA	Apiospora arundinis	0	0.0019259	0.000239749	0	0	0	0.0209802	0.0308081	0.0310037	0.0179732	0.0375728	0.017672	0.0110463	0.00294867	0.398386	0.0014397	0.000620817	0.0449257	0.0291519	0.0313093	0.00722212	0.00912288	0.00911565	0.0697375	0.0243257	0.0358853	0.000294963	0	0.123054	0.0703146	0	0.0183171	0.202081	0.158593	0.0065533	0.0117884	0.0181725	0.0027194	0.352496	0.0195103	0.00838466	0.00413693	0.0113392	0.00255581	0.0199162	0.0199769
KF144907.1.735	ITS_Apio_24	GAAATGCGATAAGTAATGTGAATTGCAGAATTCAGTGAATCATCGAATCTTTGAACGCACATTGCGCCCATCAGTATTCTGGTGGGCATGCCTGTTCGAGCGTCATTTCAACCCTTAAGCCTAGCTTAGTGTTGGGAATCTACTGTATTGTAGTTCCTTAAAGACAGTGGCGGAGCGATAGTTGTCCTCTGAGCGTAGTAAATTTATTTCTCGCTTTTGTAAGGCTCTATTCTCCCGCCATAAAACCCCCAATTTTTTAGTGGTTGACCTCGGATCAGGTAGGAATACCCGCTGAACTTAA	Arthrinium phaeospermum	0	0	0	0	0	0	0	0	0	0	0	0	0	0	0	0	0	0	0	0.00259055	0	0	0	0	0	0	0	0	0	0	0	0	0	0	0	0	0	0	0	0	0	0	0	0	0	0
KUC21680.1.665	ITS_Apio_25	GAAATGCGATAAGTAATGTGAATTGCAGAATTCAGTGAATCATCGAATCTTTGAACGCACATTGCGCCCATTAGTATTCTAGTGGGCATGCCTGTTCGAGCGTCATTTCAACCCTTAAGCCTAGCTTAGTGTTGGGAATCTACTGTACTGTAGTTCCTCAAAGACAGTGGCAGAGCGATAGGTGTCCTCTGAGCGTAGTAATTTTTTATTTCTCGCTTCTGTTAGGCCCTGCGTTCCCGCCATAAAACCCCCCATTTTTAAAGGTTGACCTCGGATCAGGTAGGAATACCCGCTGAACTTAA	Apiospora pseudohyphopodii	0.842592	0.843924	0.829383	0	0	0	0	0.00686172	0	0.00278541	0	0	0	0	0	0.000344543	0	7.13106e-05	0	0	0	0	0	0	0	0	0.000179542	4.18778e-05	0	0	0	0	0	0	0	0	0	0	0	0	0	0	0	0	0	0
KY494704.1.584	ITS_Apio_26	GAAATGCGATAAGTAATGTGAATTGCAGAATTCAGTGAATCATCGAATCTTTGAACGCACATTGCGCCCATCAGTATTCTGGTGGGCATGCCTGTTCGAGCGTCATTACAACCCTTAAGCCTAGCTTAGTGTTGGGAATCTACTGTATTGTAGTTCCTTAAAGACAGTGGCGGAGCGATAGTTGTCCTCTGAGCGTAGTAAATTTATTTCTCGCTTCTGTAAGGCTCTATTCTCCCGCCATAAAACCCCCAATTTTTTAGTGGTTGACCTCGGATCAGGTAGGAATACCCGCTGAACTTAA	Apiospora camelliae-sinensis	0	0	0	0	0	0	0	0	0	0	0	0	0	0	0	0	0	0	0	0	0	0	0	0	0	0	0	0	0	0	0	0	0	0	0	0	0	0	0	0	0	0	0	0	0	0
LC517882.1.491	ITS_Apio_27	GAAATGCGATAAGTAATGTGAATTGCAGAATTCAGTGAATCATCGAATCTTTGAACGCACATTGCGCCCATCAGTATTCTGGTGGGCATGCCTGTTCGAGCGTCATTTCAACCCTTAAGCCTAGCTTAGTGTTGGGAATCGACTGTATTGTCGTTCCTTAAAGACAGTGGCGGAGCGATAGTTGTCCTCTGAGCGTAGTAAATTTATTTCTCGCTTCTGCTAGGCCCTATCTTCTCGCCATAAAACCCCCCATCTTTTAGTGGTTGACCTCGGATCAGGTAGGAATACCCGCTGAACTTAA	Apiospora minutispora	0	0	0	0	0	0	0	0	0	0.00400708	0.0184198	0	0	0	0	0	0	0	0	0	0	0	0	0	0	0	0	0	0	0	0	0	0	0	0	0	0	0	0	0	0	0	0	0	0	0
MK351843.1.628	ITS_Apio_28	GAAATGCGATAAGTAATGTGAATTGCAGAATTCAGTGAATCATCGAATCTTTGAACGCACATTGCGCCCACTAGTATTCTGGTGGGCATGCCTGTTCGAGCGTCATTTCAACCCTTAAGCCTAGCTTAGTGTTGGGAATCCACTGTACTGTGGTTCCTTAAAGACAGTGGCGGAGCGGCAGCGGTCCTCTGAGCGTAGTAATTTTTTATTCTCGCTTCTGTTAGGCCCTGTCCTCCCGCCGTAAAACCCCCTATTTTTTAGTGGTTGACCTCGGATCAGGTAGGAATACCCGCTGAACTTAA	Apiospora hysterina	0.145116	0.131143	0.164122	0.853785	0.900958	0.785252	0.660848	0.850853	0.0173023	0.030747	0.0161145	0.00818995	0.00724729	0.00333881	0.00169221	0.00490974	0.000799697	0.000106966	0.0370067	0.0113703	0	0.000425144	0.00667473	0.0194014	0.0050375	0.0155777	0.0249307	0.0201956	0.284996	0.376195	0.289811	0.0462374	0.0115611	0.00380429	0.026502	0.0280586	0.0186097	0.0376965	0.297386	0.104677	0.028834	0.00139559	0.00610664	0.0133449	0.0015151	0.000917102
MK828608.1.546	ITS_Apio_29	GAAATGCGATAAGTAATGTGAATTGCAGAATTCAGTGAATCATCGAATCTTTGAACGCACATTGCGCCCATCAGTATTCTGGTGGGCATGCCTGTTCGAGCGTCATTTCAACCCTTAAGCCTAGCTTAGTGTTGGGAATCTACTGTATTGTAGTTCCTTAAAGACAGTGGCGGAGCGATAGTTGTCCTCTGAGCGTAGTAAATTTATTTCTCGCTTCTGTAAGGCTCTGTTCTCCCGCCATAAAACCCCCAATTTTTTAGTGGTTGACCTCGGATCAGGTAGGAATACCCGCTGAACTTAA	ITS_Apio_29	0	0	0	0	0	0	0	0	0	0	0	0	0	0	0	0	0	0	0	0	0	0	0	0	0	0	0	0	0	0	0	0	0	0	0	0	0	0	0	0	0	0	0	0	0	0
MW481713.1.572	ITS_Apio_30	GAAATGCGATAAGTAATGTGAATTGCAGAATTCAGTGAATCATCGAATCTTTGAACGCACATTGCGCCCATCAGTATTCTGGTGGGCATGCCTGTTCGAGCGTCATTTCAACCCTTAAGCCTAGCTTAGTGTTGGGAATCTACTGTATTGTAGTTCCTTAAAGACAGTGGCGGAGCGATAGTTGTCCTCTGAGCGTAGTAAATTTATTTCTCGCTTCTGTAAGGCTCTATTCTCCCGCCATAAAACCCCCAATTTTTTAGTGGTTGACCTCGGATCAGGTAGGAATACCCGCTGAACTTAA	Apiospora camelliae-sinensis	0	0	0.00255262	0	0	0	0.0193024	0.000905608	0.0262023	0.0144743	0.0430451	0.00747736	0.00821165	0.00449106	0.003699	0.00920423	0.00653437	0.00791547	0.00796615	0.00682218	0	0.000141715	0.00187929	0.00270289	0	0.00236988	0.00209039	0	0.0568506	0.0413403	0.0488815	0.00408649	0.00750555	0.00369295	0.000288789	0.007774	0.0108715	0.0115965	0.0968665	0	0	0.000428645	0	0.000179189	4.71017e-05	0
MW883402.1.673	ITS_Apio_31	GAAATGCGATAAGTAATGTGAATTGCAGAATTCAGTGAATCATCGAATCTTTGAACGCACATTGCGCCCACTAGTATTCTGGTGGGCATGCCTGTTCGAGCGTCATTTCAACCCTTAAGCCTAGCTTAGTGTTGGGAATCCACTGTACTGTGGTTCCTTAAAGACTGTGGCGGAGCGGCAGCGGTCCTCTGAGCGTAGTAATTTTTTATTCTCGCTTCTGTTAGGCCCTGTCCTCCCGCCGTAAAACCCCCTATTTTTTTAGTGGTTGACCTCGGATCAGGTAGGAATACCCGCTGAACTTAA	Apiospora hysterina	0	0	0	0	0	0	0	0.00285615	0	0	0	0	0	0	0	0	0	0	0	0	0	0	0	0	0	0	0	0	0	0.00690008	0	0	0	0	0	0	0	0	0.00102164	0	0	0	0	0	0	0
others	others	others	others	0.012292	0.0191549	0.00370201	0.139142	0.0911439	0.207167	0.298869	0.107715	0.923772	0.921344	0.884848	0.961217	0.9718	0.987715	0.595681	0.982908	0.990362	0.940634	0.925875	0.947908	0.992778	0.99031	0.982147	0.907691	0.970637	0.945047	0.972286	0.979616	0.514784	0.50525	0.610364	0.931359	0.773475	0.829642	0.966512	0.942715	0.933518	0.947988	0.247982	0.867204	0.960313	0.993909	0.981064	0.98392	0.978522	0.979106
[truncated: 43 more columns]

## Sheet: Table S3
Table S3 Mean relative abundance of the bambusicolous fungal communities across the bamboo compartments and stages
Genus	Mean Relative abundance
-	Culm	Leaf	Root	Soil
Apiospora	0.465622	0.132467	0.030155	0.003715
Mycena	0.00437	0.000575	0.126519	0.018165
Fusarium	0.01096	0.035011	0.0338	0.006593
Hydropus	0.000272	1.1e-05	0.065332	0.003651
Phialemoniopsis	0.059628	2.6e-05	3e-06	0
Fibrodontia	0.04048	0.008938	0.003936	0
Mortierella	0.000112	8e-06	0.007602	0.129561
Didymella	0.035833	0.01498	7e-05	0.00199
Neocladophialophora	4e-06	0.042803	6e-06	5e-06
Acaulium	0.042614	0	6e-06	0
Shiraia	0	0.039503	6.9e-05	0.001328
Colletotrichum	0.000819	0.036645	0.000137	6.3e-05
Stachylidium	0.038568	0	1e-06	0
Diatrypella	0.017832	0.018783	4.6e-05	0
Scleropezicula	0	0.03475	0	3e-06
Cyphellophora	0.026246	0.001631	2e-06	0.001459
Phyllachora	0.000546	0.024518	0.000219	0.002283
Neptunomyces	0.001229	0.022674	0.00041	0.001958
Trichoderma	0.000874	0.000149	0.00611	0.039145
Parasarocladium	0.000337	0.018882	1e-06	4.9e-05
Cladophialophora	6e-05	7e-06	0.01272	0.015521
-	Young	Mature	Dead	Inorganic
Apiospora	0.222112	0.233856	0.163256	0.003715
Mycena	0.018994	0.087616	0.025395	0.018165
Fusarium	0.005113	0.038567	0.035875	0.006593
Hydropus	9.1e-05	0.000112	0.065405	0.003651
Phialemoniopsis	1.7e-05	9.9e-05	0.057333	0
Fibrodontia	0.003453	0.007287	0.041243	0
Mortierella	0.000159	0.006692	0.000872	0.129561
Didymella	0.002784	0.035121	0.011753	0.00199
Neocladophialophora	0.000106	0.042707	4e-06	5e-06
Acaulium	0.000309	0.000647	0.040097	0
Shiraia	0.008294	0.008332	0.023252	0.001328
Colletotrichum	0.030904	0.006915	0.000896	6.3e-05
Stachylidium	0.00077	0.00054	0.035859	0
Diatrypella	0.000354	0.035421	0.00024	0
Scleropezicula	0	0	0.03475	3e-06
Cyphellophora	0.000457	0.001905	0.024561	0.001459
Phyllachora	0.009082	0.002872	0.013645	0.002283
Neptunomyces	0.001628	0.00122	0.021481	0.001958
Trichoderma	0.00626	0.000121	0.00095	0.039145
Parasarocladium	0.019085	0.000538	0.00029	4.9e-05
Cladophialophora	0.002552	0.004599	0.005728	0.015521

## Sheet: Table S4
Table S4 Venn diagram of genus level community and Apiospora species level community
	Compartment (culm, leaf, root, soil)			Culm-stage			Leaf-stage			Root-stage
Community	Venn diagram	Total number	Elements	Venn diagram	Total number	Elements	Venn diagram	Total number	Elements	Venn diagram	Total number	Elements
Genus level	Culm x Leaf x Root x Soil	14	Trichoderma	Mature x Dead x Young	14	Trichoderma	Mature x Dead x Young	12	Trichoderma	Mature x Dead x Young	9	Trichoderma
			Phyllachora			Neptunomyces			Phyllachora			Neptunomyces
			Neptunomyces			Colletotrichum			Shiraia			Colletotrichum
			Colletotrichum			Apiospora			Neptunomyces			Apiospora
			Apiospora			Mycena			Colletotrichum			Mycena
			Mycena			Parasarocladium			Apiospora			Fusarium
			Neocladophialophora			Stachylidium			Mycena			Hydropus
			Parasarocladium			Diatrypella			Parasarocladium			Mortierella
			Fusarium			Fusarium			Fusarium			Cladophialophora
			Cyphellophora			Fibrodontia			Fibrodontia
			Hydropus			Cyphellophora			Cyphellophora
			Cladophialophora			Hydropus			Didymella
			Mortierella			Acaulium
			Didymella			Didymella
	Culm x Leaf x Root	3	Diatrypella	Mature x Young	1	Phyllachora	Mature x Young	3	Neocladophialophora	Mature x Young	1	Didymella
			Fibrodontia						Diatrypella
			Phialemoniopsis						Phialemoniopsis
	Leaf x Root x Soil	1	Shiraia	Dead x Young	1	Cladophialophora	Dead x Young	1	Hydropus	Dead x Young	2	Shiraia
	Culm x Root	2	Stachylidium									Fibrodontia
			Acaulium	Mature x Dead	1	Phialemoniopsis	Mature x Dead	0		Mature x Dead	3	Diatrypella
	Leaf x Soil	1	Scleropezicula									Phialemoniopsis
												Acaulium
				Young	2	Neocladophialophora	Young	1	Cladophialophora	Young	0
						Mortierella
				Mature	0		Mature	1	Mortierella	Mature	3	Parasarocladium
												Neocladophialophora
												Cyphellophora
				Dead	0		Dead	1	Scleropezicula	Dead	2	Phyllachora
												Stachylidium
Apiospora species level	Culm x Leaf x Root x Soil	4	Apiospora pseudohyphopodii	Mature x Dead x Young	4	Apiospora arundinis	Mature x Dead x Young	6	Apiospora pseudohyphopodii	Mature x Dead x Young	4	Apiospora arundinis
			Apiospora arundinis			Apiospora hysterina			Apiospora arundinis			Apiospora hysterina
			ITS_Apio_22			ITS_Apio_22			ITS_Apio_1			ITS_Apio_22
			Apiospora camelliae-sinensis			Apiospora camelliae-sinensis			Apiospora hysterina			Apiospora camelliae-sinensis
	Culm x Leaf x Root	2	ITS_Apio_13						ITS_Apio_22
			Apiospora hysterina						Apiospora camelliae-sinensis
	Culm x Root	1	Arthrinium phaeospermum	Dead x Young	1	Apiospora pseudohyphopodii	Dead x Young	0		Dead x Young	0
	Culm	2	ITS_Apio_12	Mature x Dead	1	ITS_Apio_12	Mature x Dead	0		Mature x Dead	0
			Apiospora sp. 1	Young	0		Young	0		Young	1	ITS_Apio_13
	Leaf	2	ITS_Apio_1	Mature	3	ITS_Apio_13	Mature	1	ITS_Apio_13	Mature	0
			Apiospora minutispora			Arthrinium phaeospermum
	Root	1	ITS_Apio_29			Apiospora sp. 1
				Dead	0		Dead	1	Apiospora minutispora	Dead	3	Apiospora pseudohyphopodii
												Arthrinium phaeospermum
												ITS_Apio_29

## Sheet: Table S5
Table S5 Shannon diversity analyses using ANOVA or kruskal-wallis test method for the bambusicolous fungal communities across the bamboo tissues and stages, respectively
			Nomarlity test						Mulitple comparisons
Community	Sample	Alpha diversity	Durbin-Watson test	Shapiro-Wilk normality test	Bartlett test of homogeneity of variances	Nomarlity	Selected method	p value	Method	Comparison	p value
Genus level	Tissues (Culm, Leaf, Root)	Shannon	1.901e-06	0.003005	0.8627	X	Kruskal-Wallis rank sum test	0.0002 ***	Dunn's Test with Benjamini-Hochberg	Culm - Leaf	0.00013 ***
										Culm - Root	0.04624
										Leaf - Root	0.05102
	Stages (Young, Mature, Dead)	Shannon	3.102e-08	0.02579	0.9716	X	Kruskal-Wallis rank sum test	0.1448	Dunn's Test with Benjamini-Hochberg	Young - Dead	0.466519
										Mature - Young	0.336161
										Dead - Young	0.148147
Apiospora species level	Tissues (Culm, Leaf, Root)	Shannon	0.0001641	0.06571	0.1179	O	ANOVA	0.00005 ***	Tukey's HSD test	Culm - Leaf	0.00005 ***
										Culm - Root	0.36022
										Leaf - Root	0.00468 **
	Stages (Young, Mature, Dead)	Shannon	2.221e-05	0.01799	0.1532	X	Kruskal-Wallis rank sum test	0.598	Dunn's Test with Benjamini-Hochberg	Young - Dead	1
										Mature - Young	0.599517
										Dead - Young	0.954633
Genus level	Culm	Shannon	1.8e-05	0.3411	0.3035	O	ANOVA	0.409	Tukey's HSD test	Mature-Dead	0.9383
										Mature-Young	0.5906
										Dead-Young	0.3988
	Leaf	Shannon	0.1999	0.1447	0.06473	X	Kruskal-Wallis rank sum test	0.1827	Dunn's Test with Benjamini-Hochberg	Mature - Dead	0.4057
										Mature - Young	0.469
										Dead - Young	0.1968
	Root	Shannon	3e-06	0.0267	0.9166	O	ANOVA	0.71	Tukey's HSD test	Mature - Dead	0.7216
										Mature - Young	0.984
										Dead - Young	1
Apiospora species level	Culm	Shannon	0.01481	0.453	0.07141	O	ANOVA	0.383	Tukey's HSD test	Mature - Dead	0.3796
										Mature-Young	0.9503
										Dead-Young	0.5772
	Leaf	Shannon	0.08297	0.1351	0.08092	X	Kruskal-Wallis rank sum test	0.02630 **	Dunn's Test with Benjamini-Hochberg	Mature-Dead	0.04880 *
										Mature-Young	0.7216
										Dead-Young	0.03780 *
	Root	Shannon	0.1016	0.4444	0.7516	X	Kruskal-Wallis rank sum test	0.3771	Dunn's Test with Benjamini-Hochberg	Mature-Dead	0.882
										Mature-Young	0.6049
										Dead-Young	0.3887
Significance levels were indicated by Asterisks, *p < 0.05, **p < 0.01 and ***p < 0.001.

## Sheet: Table S6
Table S6 Beta diversity analyses for the bambusicolous fungal communities across each bamboo tissue-stages using principal coordinates analysis based on Bray-curtis distance
								Goodness of fit
Community	Sample	PCoA1 (%)	PCoA2 (%)	Selected vectors	r2	p valuea	Factors	r2	p valuea
Genus level	Culm	40	23				Stages	0.1492	0.324
				Apiospora	0.927	0.007 **
				Phialemoniopsis	0.3149	0.119
				Fibrodontia	0.2248	0.231
				Acaulium	0.9767	0.007 **
				Stachylidium	0.9785	0.007 **
				Cyphellophora	0.9378	0.007 **
				others	0.3935	0.021 *
	Leaf	28	20				Stages	0.2979	0.006 **
				Apiospora	0.7095	0.009 **
				Fibrodontia	0.548	0.009 **
				Didymella	0.5104	0.027 *
				Neocladophialophora	0.3427	0.09
				Colletotrichum	0.8131	0.009 **
				Diatrypella	0.2656	0.144
				Phyllachora	0.5882	0.009 **
				Neptunomyces	0.4525	0.027 *
				Parasarocladium	0.7689	0.009 **
	Root	32	19				Stages	0.1325	0.48
				Apiospora	0.6251	0.005 **
				Mycena	0.5429	0.005 **
				Fusarium	0.2079	0.255
				Fibrodontia	0.2573	0.075 **
				Parasarocladium	0.1697	0.19
Apiospora species level	Culm	35	22				Stages	0.2858	0.018 *
				Apiospora.arundinis	0.7709	0.004 **
				Apiospora.hysterina	0.7676	0.004 **
				ITS_Apio_12	0.2946	0.072		.
				ITS_Apio_13	0.2712	0.072		.
	Leaf	42	19				Stages	0.1498	0.208
				Apiospora.arundinis	0.2151	0.216
				Apiospora.hysterina	0.728	0.006 **
				Apiospora.pseudohyphopodii	0.2574	0.114
				ITS_Apio_01	0.1871	0.24
				ITS_Apio_13	0.3109	0.024 *
				ITS_Apio_22	0.2987	0.078		.
	Root	49	23				Stages	0.331	0.006 **
				Apiospora.arundinis	0.6211	0.003 **
				Apiospora.camelliae.sinensis	0.3564	0.004 **
				Apiospora.hysterina	0.3819	0.004 **
aBonferroni adjusted p value
Significance levels were indicated by Asterisks, *p < 0.05, **p < 0.01 and ***p < 0.001.

## Sheet: Table S7
Table S7 Biological activities of major bambusicolous endophytic Apiospora
Fungal Identity	ID	Antioxidant Activity IC50 (µg/ml)			Antifungal Activity Screening c						Plant hormone d
		ABTS a	DPPH b		KUC21265	KUC21266		KUC21267				IAA		ABA			GA
Apiospora arundinis	KUC21601	398	493		-	-		-				-		-			-
	KUC21792	559	380		-	-		-				-		-			-
	KUC21722	1000	558		-	-		-				-		-			-
Apiospora camelliae-sinensis	KUC21546	655	672		-	-		-				-		-			-
	KUC21536	894	>1000		-	-		-				-		+			-
	KUC21538	228	>1000		+	-		-				-		+			-
Apiospora hysterina	KUC21437	435	587		+	+		-				-		+			+
	KUC21435	184	888		+	+		-				-		+			+
	KUC21438	255	>1000		-	-		-				-		-			+
Trolox	positive control	179
L-Ascorbic acid	positive control		178
aABTS Radical Scavenging Activity.
bDPPH Radical Scavenging Activity
cKUC21265, Botrytis cinerea; KUC21266, Colletotrichum gloeosporioides; KUC21267, Fusarium oxysporum
dIAA, indole 3-acetic acid; ABA, abscisic acid; GA, Gibberellic acid; +: detected, -: not detected.

## Sheet: Table S8
Table S8 Secondary metabolites biosynthesis gene clusters of Apiospora hysterina KUC21437
Most similar known clusters	Regions	Types	Gene show similarity	BGC codes
AbT1	1.3	NRPS	1	BGC0000307
	1.4	NRPS	1	BGC0000307
ACR toxin I	3.5	T1PKS	1	BGC0001252
	6.1	T1PKS, NRPS	1	BGC0001252
Dimethyl coprogen	3.7	NRPS	1	BGC0001249
(R)-Mellein	6.4	Indole, T1PKS	1	BGC0001244
ACT-Toxin II	6.6	T1PKS	1	BGC0001254
betaestacin	2.5	terpene	0.75	BGC0001528
pseurotin / azaspirene	1.9	T1PKS, NRPS, terpene	0.6	BGC0001037
ascochlorin	4.14	T1PKS, NRPS-like	0.5	BGC0001923
PR-toxin	3.1	terpene	0.5	BGC0000667
	7.5	T1PKS, terpene	0.5	BGC0000667
eupenifeldin	8.7	T1PKS	0.45	BGC0001976
naphthalene	1.8	T1PKS	0.44	BGC0001906
squalestatin S1	8.3	terpene	0.4	BGC0001839
betaenone A / betaenone B / betaenone C	6.8	T1PKS	0.37	BGC0001264
neosartorin	1.5	NRPS, T1PKS	0.36	BGC0001988
solanapyrone D	4.5	T1PKS	0.33	BGC0000146
depudecin	5.4	T1PKS	0.33	BGC0000046
wortmanamide A / wortmanamide B	8.6	T1PKS, Fungal-RiPP	0.33	BGC0001954
4-epi-15-epi-brefeldin A	3.9	T1PKS	0.2	BGC0001141
patulin	1.2	NRPS	0.13	BGC0000120
ankaflavin / monascin / rubropunctatine / monascorubrin	2.1	T1PKS	0.12	BGC0000027
fusaridione A	3.6	NRPS-like, T1PKS, NRPS, Indole	0.12	BGC0000992
shearinine D	7.6	Terpene,T1PKS	0.09	BGC0001776
