# Supplementary material for: Exploring multifaceted roles of bambusicolous Apiospora in Phyllostachys sp.
Source: Research Square preprint supplement (doi:10.21203/rs.3.rs-6757679/v1), 2025-05-30
Supplement: Supplementary file 2 [file a93b41b968f34042152a902a.docx]

**
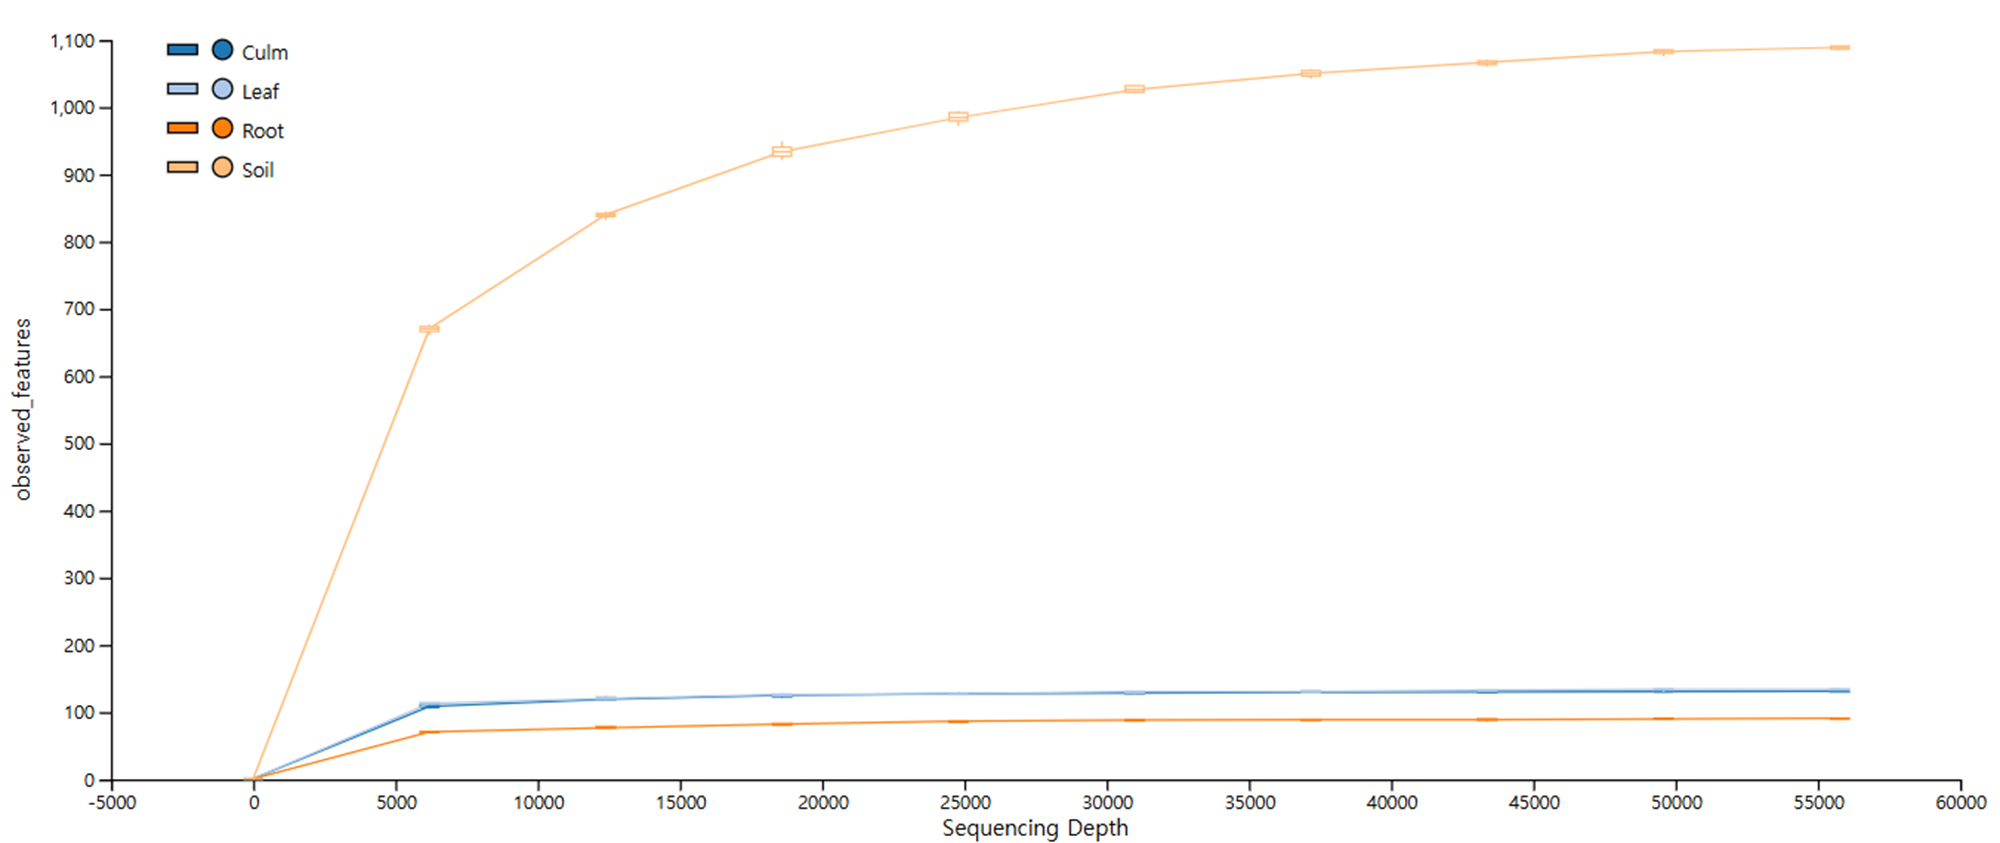
**

**Fig. S1.** Rarefaction curves of the fungal community at different compartment in bamboo forest.


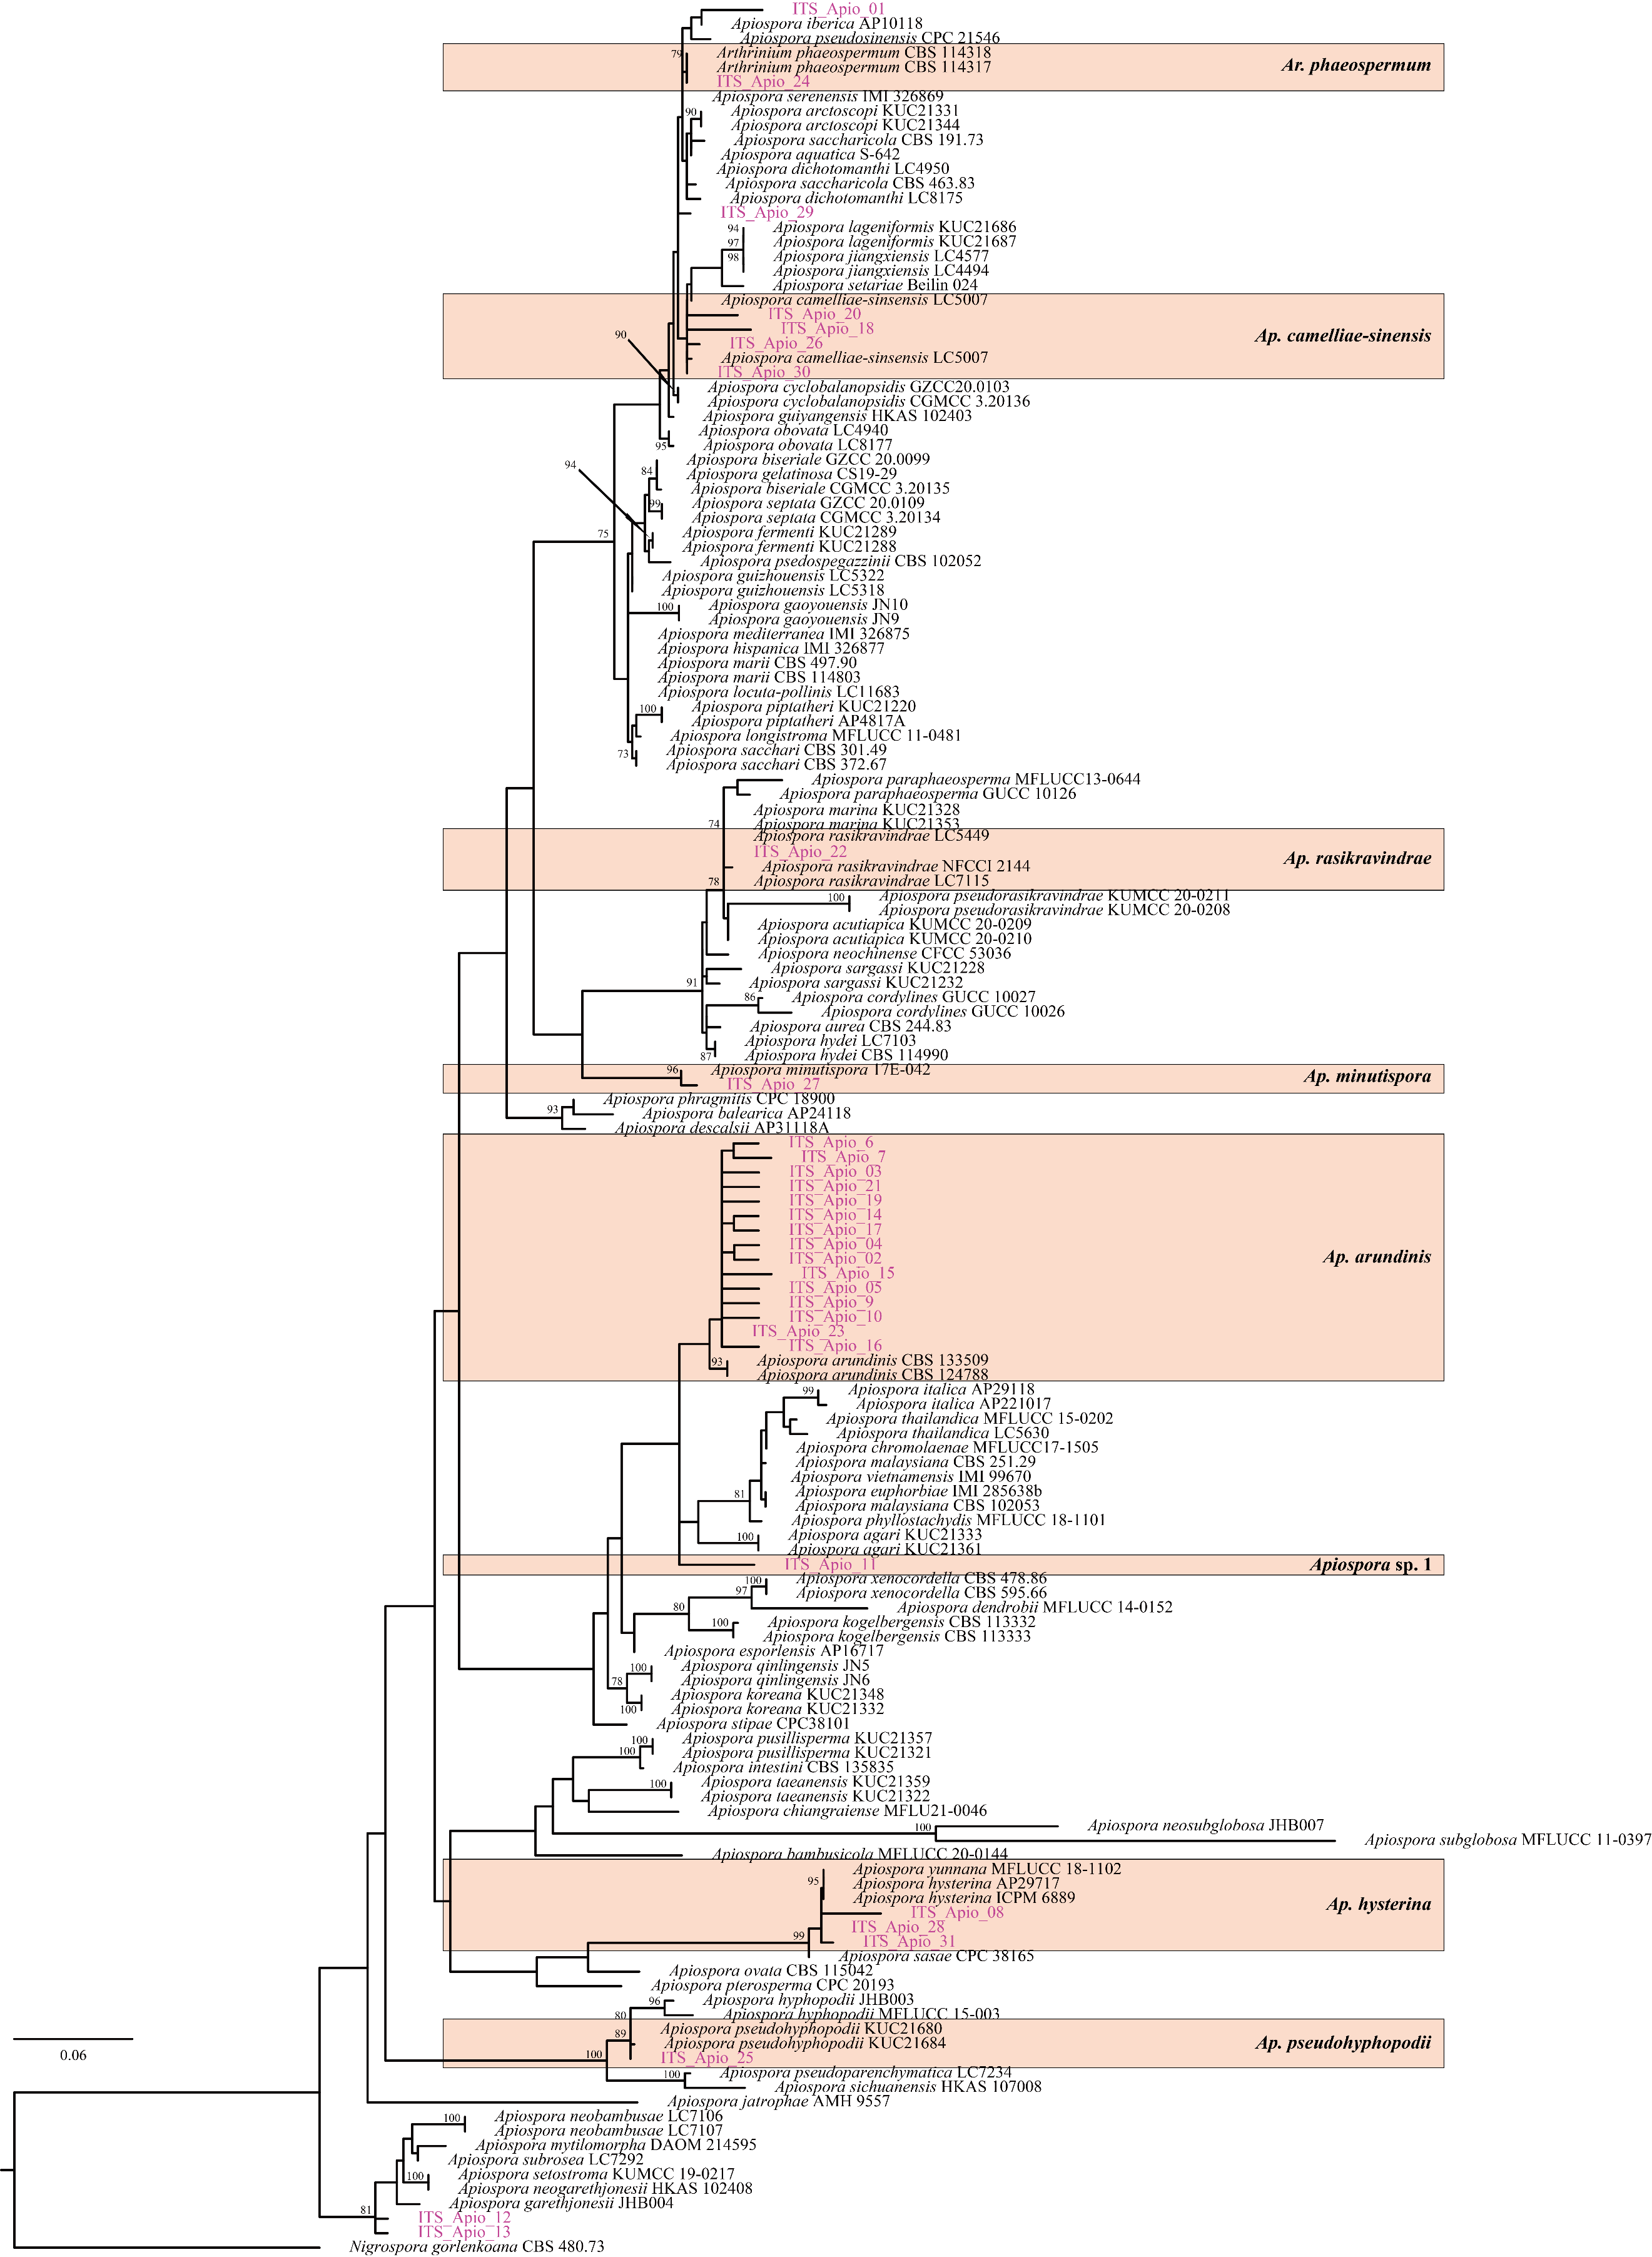


**Fig. S2.** Phylogenetic analysis of bambusicolous endophytic *Apiospora*. ML tree based on ITS datasets. The node numbers indicate the ML bootstrap support (BS) > 70%. *Apiospora* candidates examined in this study are shown in purple color. The boxes indicate the identified *Apiospora* species at the species level.


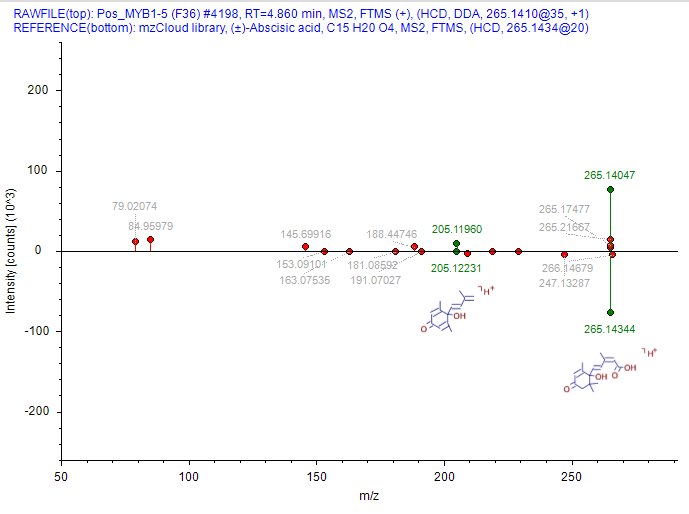


**Fig. S3.** The MS/MS spectral matching of the experimental spectrum and ABA standard spectrum in mzCloud library.

**
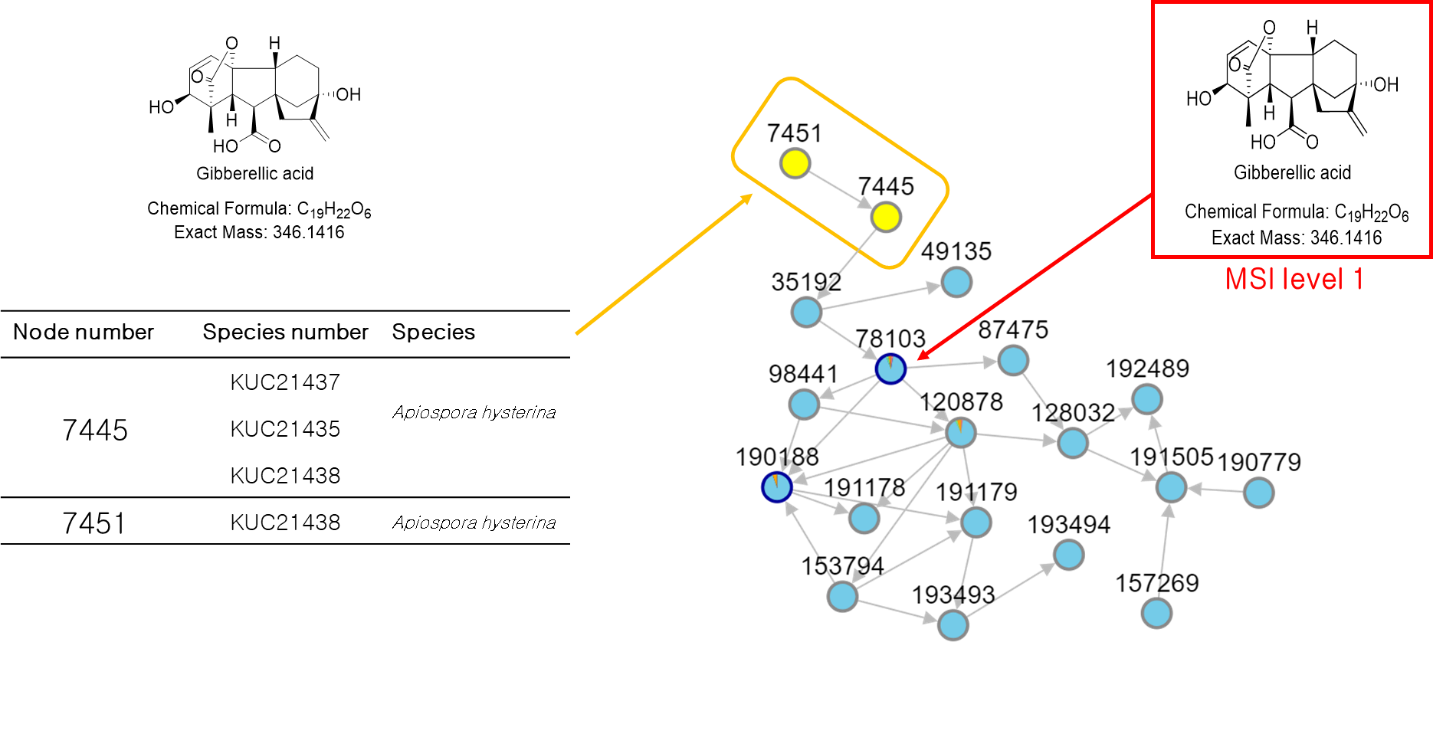
**

**Fig. S4.** Molecular networking of EtOAc extracts of *Apiospora* spp. culture medium.

**
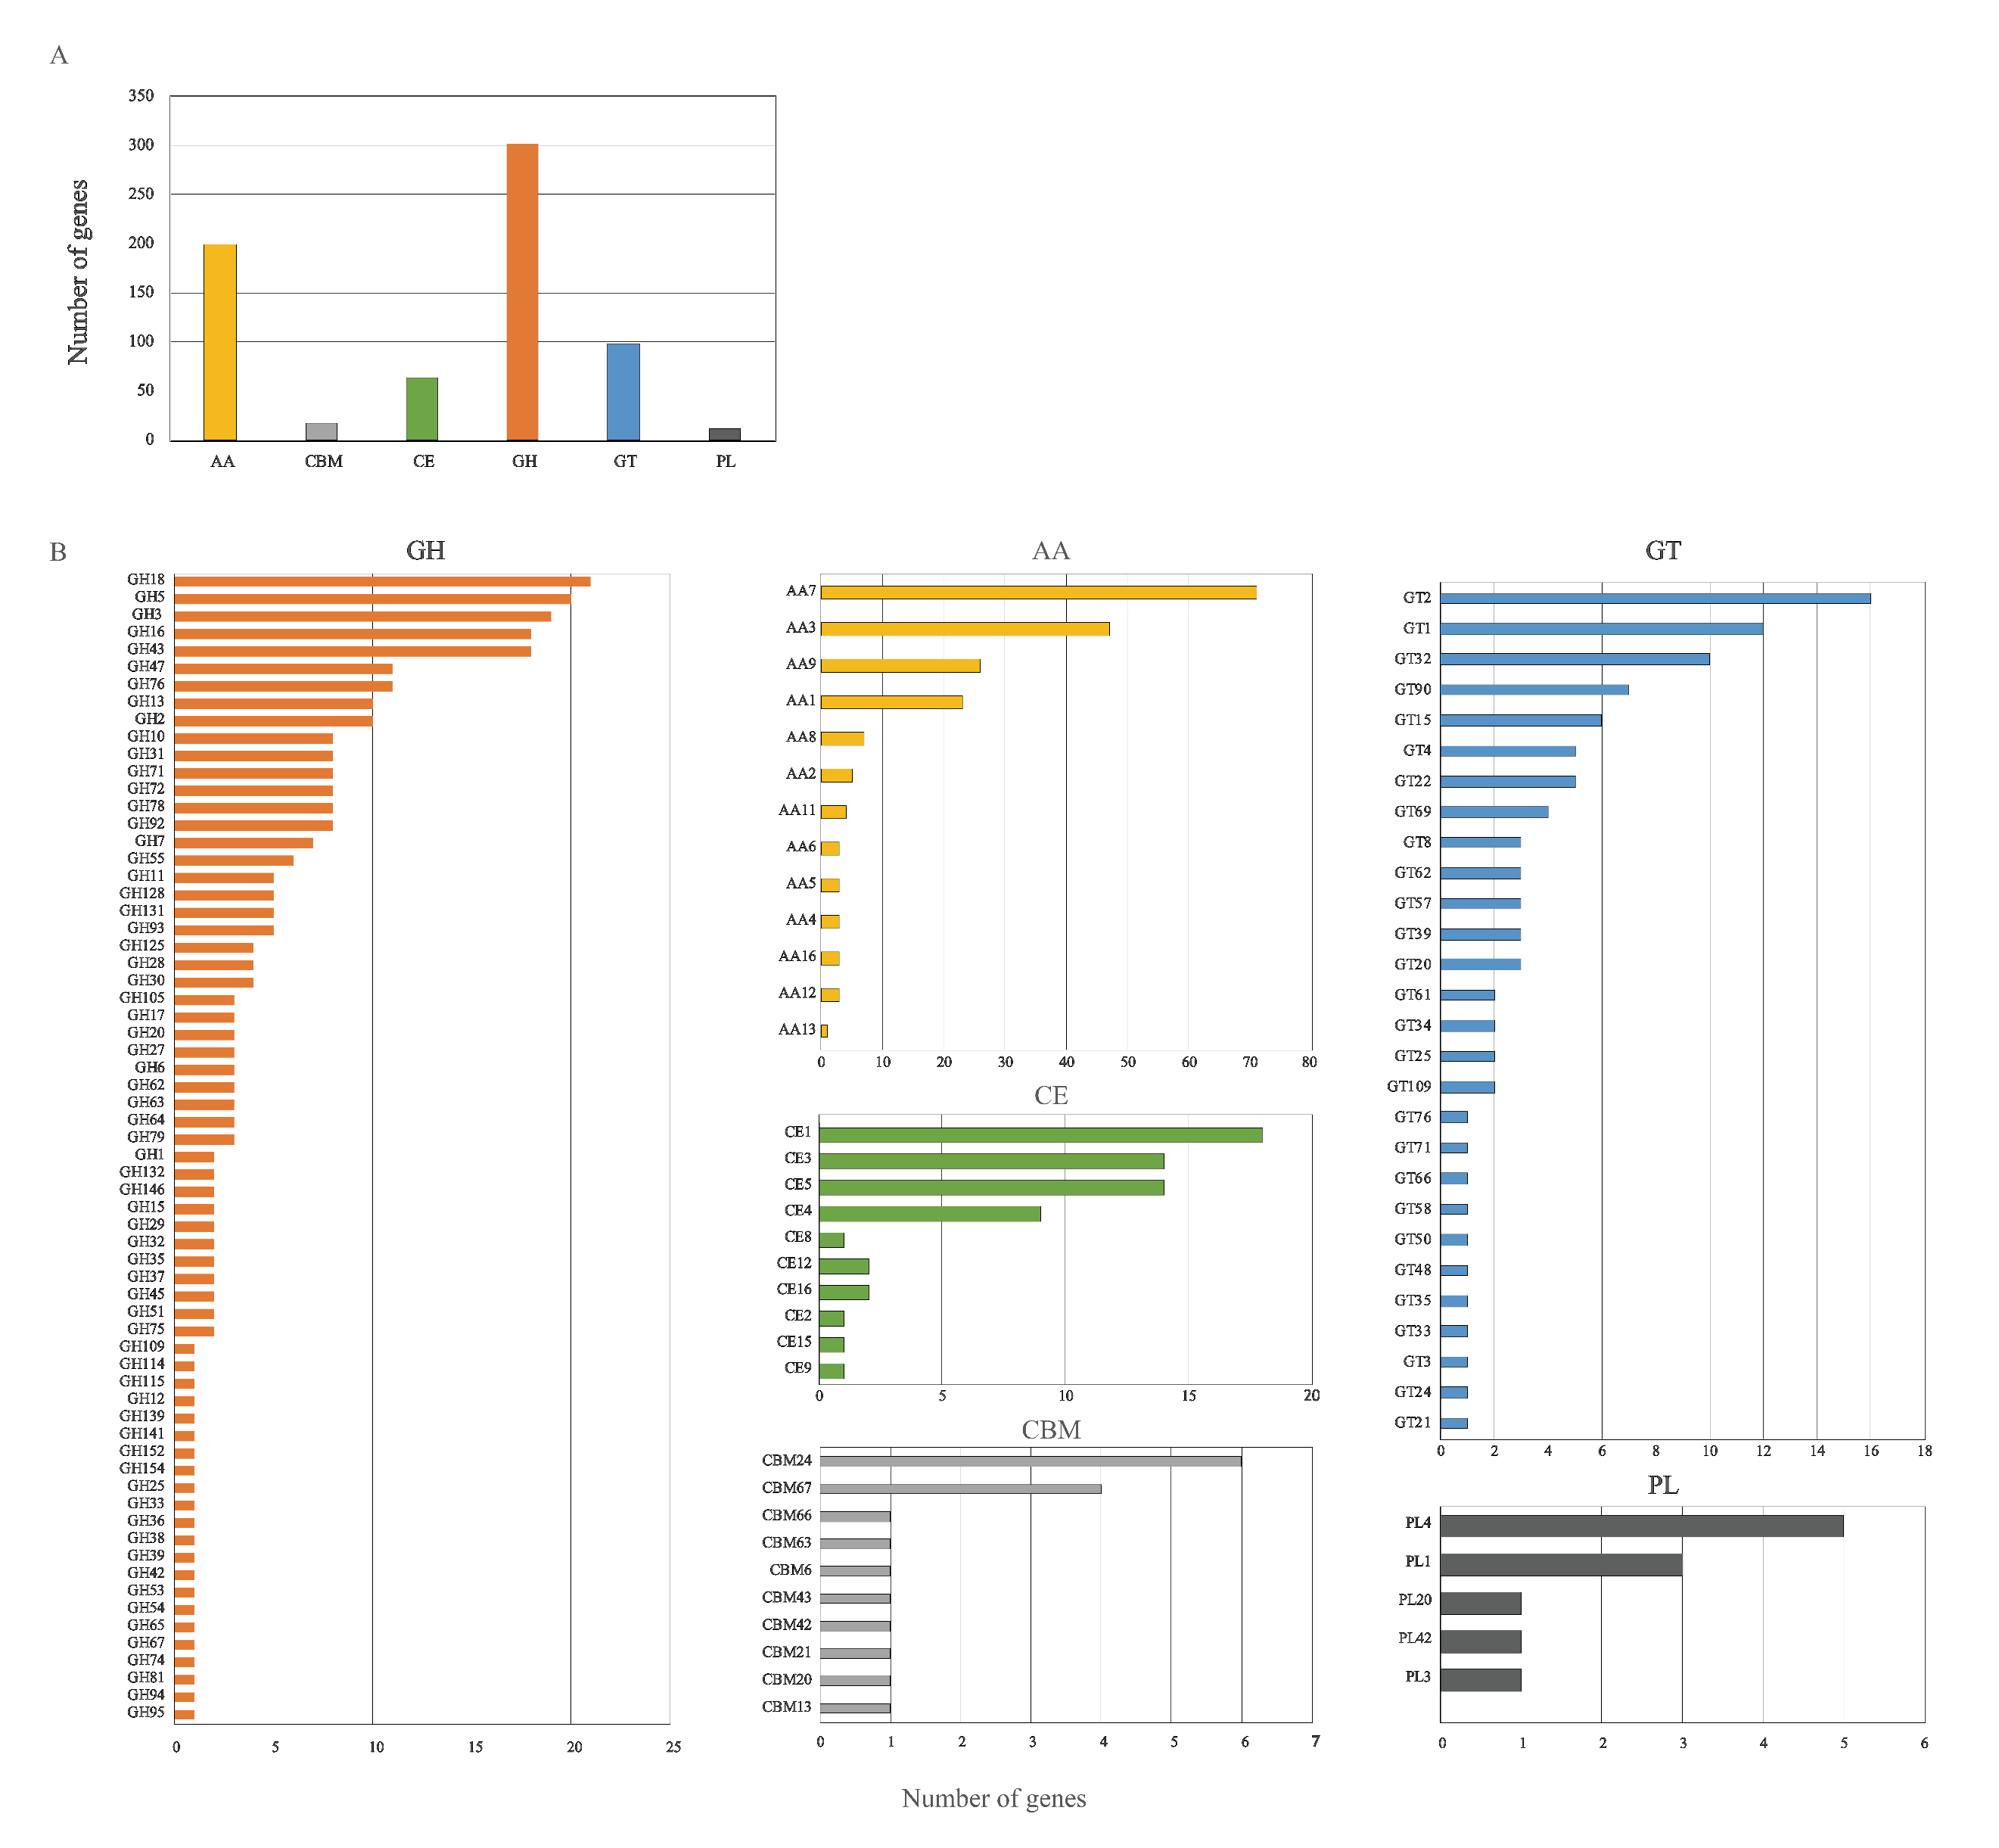
**

**Fig. S5.** Distribution of Carbohydrate-active enzyme (CAZyme). **A** Gene numbers of CAZyme classes: auxiliary activity (AA), carbohydrate-binding modules (CBM), carbohydrate esterase (CE), glycoside hydrolase (GH), glycosyl transferase (GT), and polysaccharide lyase activity (PL); **B** Gene numbers of CAZymes families according to CAZyme classes.





**Fig. S6.** The number of Biosynthetic Gene Clusters (BGCs) of *Ap. hysterina* KUC21437.
